# Supplementary material for: Impact of proton pump inhibitor use on immune-related adverse events in patients with non- small cell lung cancer: A retrospective study
Source: Research Square preprint supplement (doi:10.21203/rs.3.rs-8247972/v1), 2025-12-12
Supplement: Supplementary file 1 [file 7d3411de9a08f301621ed0f3.docx]

**Impact of proton pump inhibitor use on immune-related adverse events in patients with non-small cell lung cancer: A retrospective study**

Ippei Miyamoto1, Tetsuo Shimizu1, Mizuki Hanamura1, Ryoma Tanaka1, Ryo Kusahana1, Masayuki Nomoto1, Kenichi Sugaya1, Yoshiko Nakagawa1, Yasuhiro Gon1

1Division of Respiratory Medicine, Department of Internal Medicine, Nihon University School of Medicine, Tokyo, 30-1 Oyaguchi Kamicho, Itabashi Ku, Tokyo 173-8610, Japan

*Correspondence author: Tetsuo Shimizu, MD, PhD

Division of Respiratory Medicine, Department of Internal Medicine, Nihon University School of Medicine, Tokyo, 30-1 Oyaguchi Kamicho, Itabashi Ku, Tokyo 173-8610, Japan

E-mail: shimizu.tetsuo@nihon-u.ac.jp

Tel: +81-3-3972-8111

FAX: +81-3-3972-0015

ORCID ID: 0000-0003-3405-9652

**Supplementary Fig. 1**: Types of proton pump inhibitors used at the initiation of ICI therapy.

**
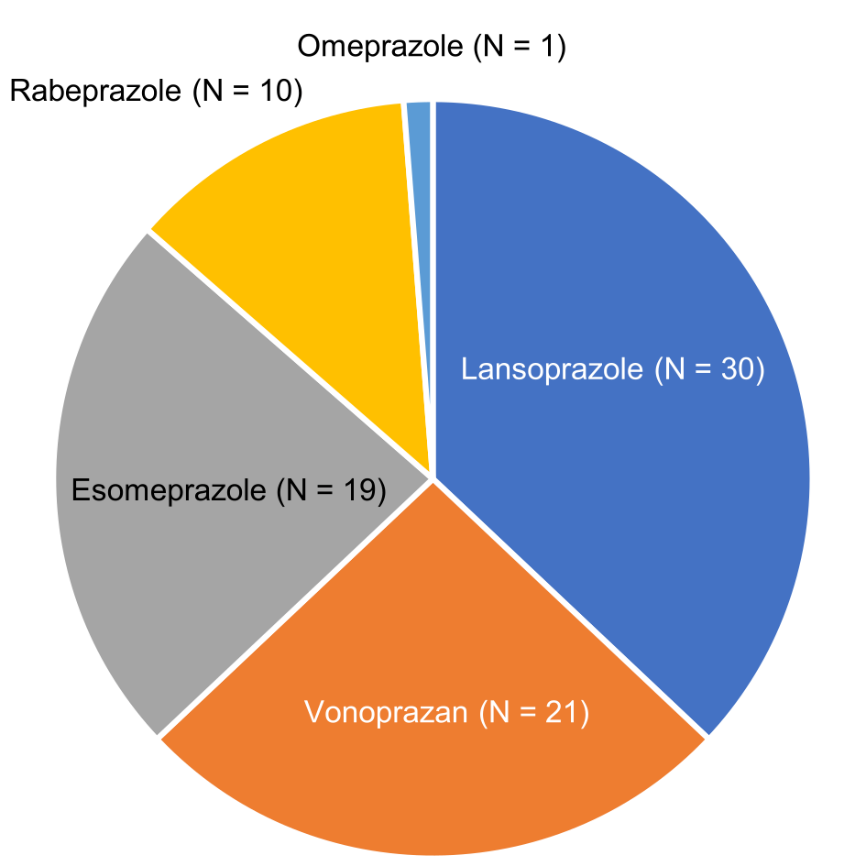
**

**Supplementary Table 1:** Multivariate logistic regression analysis of factors associated with the occurrence of CIP

Abbreviations: CIP: checkpoint inhibitor pneumonitis, OR: odds ratio, CI: confidence interval, COPD: chronic obstructive pulmonary disease, PPI: proton pump inhibitors.

| Characteristics | CIP | |
| --- | --- | --- |
| OR (95% CI) | *p* value |
| COPD/pulmonary emphysema |  |  |
| (+) |  |  |
| (-) | 0.798 (0.328-1.940) | 0.619 |
| Treatment pattern |  |  |
| Use of pembrolizumab | 1.380 (0.534-3.550) | 0.508 |
| Others |  |  |
| PPI exposure |  |  |
| (+) | 1.290 (0.543-3.070) | 0.563 |
| (-) |  |  |
